# Supplementary material for: Taking care of knowledge, taking care of salmon: towards Indigenous data sovereignty in an era of climate change and cumulative effects
Source: Atypon-hosted journal article supplement (doi:10.1139/facets-2023-0135), 2024-01-01

# INDIGENOUS STEWARDSHIP OF SALMON WATERSHEDS WEBINAR SERIES

## Webinar 2: Taking care of knowledge, taking care of salmon: Indigenous data sovereignty

Thursday, June 2

### OBJECTIVES

The overall purpose of the WFI webinar series is to explore Indigenous perspectives on improvements in the governance and management of cumulative effects in BC's salmon-bearing watersheds.

The goal of Webinar #2 is to identify tangible action steps and implementable recommendations for First Nation sovereignty and governance of Indigenous data related to cumulative effects and climate change in salmon-bearing watersheds.

### SCOPE & FORMAT

This webinar will have a similar format to our June 2021 webinar, with short presentations followed by opportunities for the exchange of first-hand experience and information sharing among participants. This second event is also intended to identify opportunities for Indigenous communities and groups to take actionable steps—individually or collectively—to improve the management of cumulative effects in BC's salmon watersheds, and generate recommendations for collaborators seeking to support Indigenous Peoples and groups on this journey.

This webinar is **not** intended as a forum for:

- An examination of the science of climate change or the modelling of impacts in BC;
- Detailed, quantitative assessment of cumulative effects in any one salmon watershed or across BC's entire salmon ecosystem;
- A systematic evaluation of current strategies for managing impacts to salmon watersheds; or,
- Discussion of funding opportunities for community-based efforts to tackle cumulative effects.

This webinar series is being designed by a Planning Committee composed of leading Indigenous practitioners, managers and academics, including the webinar Chair Stu Barnes, Chair of the Skeena Fisheries Commission; Bob ('Galagame') Chamberlin, Planning Committee Chair and Chairman of the First Nation Wild Salmon Alliance; Andrea Reid, Assistant Professor and Principal Investigator for the Centre for Indigenous Fisheries, University of British Columbia; and Jennifer Walkus, Wuikinuxw Tribal Councilor.

Planning support and technical assistance for the webinars has been provided by members of the Coordination Team of the Watershed Futures Initiative (WFI): Jonathan Moore, Nigel Sainsbury, Sara Cannon, Julian Griggs, and Emma Griggs. The Watershed Futures Initiative is a collaborative initiative that will undertake and coordinate research on cumulative effects in British Columbia's salmon-bearing watersheds, initiate dialogue among researchers, practitioners, and policy-makers, and share emerging results via webinars and workshops.

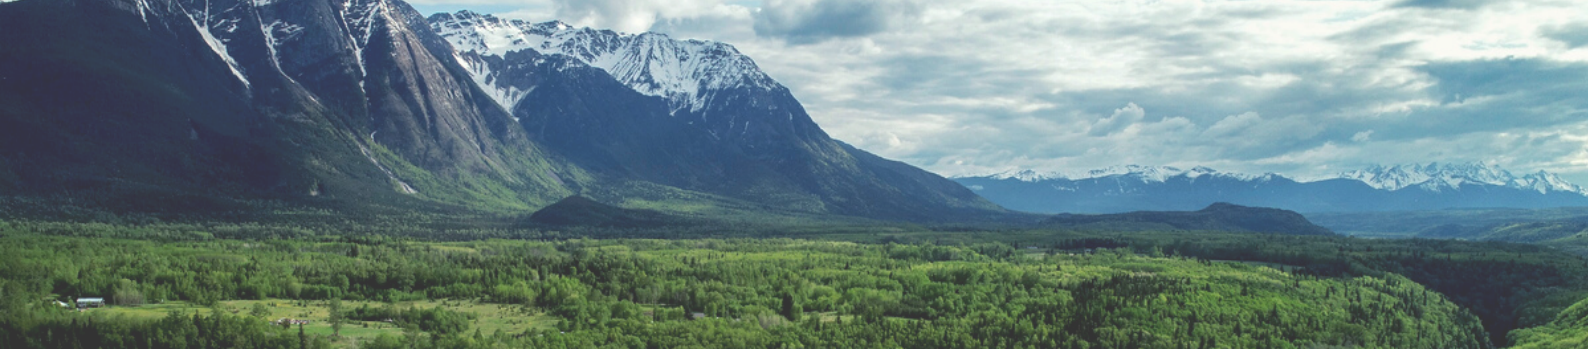

## WEBINAR AGENDA

| TIME     | TOPIC                                                                                                                                                                                                                |
|----------|----------------------------------------------------------------------------------------------------------------------------------------------------------------------------------------------------------------------|
| 9:00 am  | <b>Orientation (10 mins)</b><br>With opening remarks from Webinar Chair Bob ('Galagame') Chamberlin, Chairman, First Nation Wild Salmon Alliance                                                                     |
| 9:10am   | <b>Background: Why Are We Here (5 mins)</b>                                                                                                                                                                          |
| 9:15 am  | <b>Background Case Studies: Data Sovereignty and Governance (25 mins)</b> <ul style="list-style-type: none"><li>• Andrea Reid - Nisga'a Nation</li><li>• Sean Young - Haida Nation</li></ul>                         |
| 9:40 am  | <b>Q&amp;A (15 mins)</b>                                                                                                                                                                                             |
| 9:55 am  | <b>Small Group Discussions #1 (15 mins)</b>                                                                                                                                                                          |
| 10:10 am | <b>Break (10 mins)</b>                                                                                                                                                                                               |
| 10:20 am | <b>Case Studies: Examples of Challenges and Success in Data Governance (~40 mins)</b> <ul style="list-style-type: none"><li>• Jennifer Walkus and Megan Adams</li><li>• Tara Marsden</li><li>• Kelly Speck</li></ul> |
| 11:00 am | <b>Moderated Q&amp;A (~15 mins)</b>                                                                                                                                                                                  |
| 11:15 am | <b>Small Group Discussions #2 (~ 50 mins)</b>                                                                                                                                                                        |
| 12:05pm  | <b>Additional Reflections (10 mins)</b><br>K_ii'iljuus (Barb) Wilson, Haida Nation                                                                                                                                   |
| 12:15pm  | <b>Wrap Up (15 mins)</b>                                                                                                                                                                                             |
| 12:30pm  | <b>Close</b>                                                                                                                                                                                                         |

# PARTICIPANT PRIMER: BACKGROUND ON INDIGENOUS DATA SOVEREIGNTY

Indigenous knowledge is invaluable and irreplaceable. Indigenous knowledge systems encompass experiences and insights from thousands of generations of those who have taken care of their lands and waters. Indigenous knowledge systems encode cultural worldviews and offer protocols and guidance for appropriate behaviour. Indigenous knowledge also includes scientific observations, often referred to as data, made by Indigenous Peoples in traditional and contemporary territories.

*"Information, data, and research about our peoples—collected about us, with us, or by us—belong to us and must be cared for by us."*

*- Liz La quen náay Kat  
Saas Medicine Crow*

Knowledge about salmon systems has been held and passed down through generations by First Nations Peoples in BC. That knowledge has been used to sustainably steward salmon systems for millennia. Compiling, managing, and using Indigenous knowledge is therefore a critical ingredient for Indigenous Peoples re-establishing control of salmon watersheds in their traditional and contemporary territories.

## **WHAT IS INDIGENOUS DATA?**

For this webinar, we define Indigenous data relating to salmon watersheds as, "Indigenous cultural heritage embedded in languages, knowledge, practices, technologies, natural resources, and territories, and data collected by a Nation themselves or other governments and institutions, about salmon systems in the Nation's territories". Common examples of Indigenous data relating to salmon watersheds might include: Indigenous knowledge passed down through generations; salmon counts carried out by Indigenous fisheries experts; and freshwater environmental data measured by Indigenous technicians and scientists.

It is important to acknowledge that data is intertwined with colonization. Non-Indigenous people have stolen, ignored, collected without consent, and mis-interpreted Indigenous knowledge in many ways that have negatively impacted First Nations in BC. For example, non-Indigenous researchers have visited Indigenous communities to collect data from people and traditional territories for their own benefit without permission or reciprocity. Indigenous data collected by non-Indigenous actors has been used selectively in natural resource management decisions in which Indigenous expertise and voices are excluded. Environmental assessment data has been collected on behalf of industrial proponents, treated as proprietary, and used to justify project approval.

These acts have been perpetrated by a range of groups, including from governments, academia, and the private sector. At the same time, knowledge held by Indigenous Peoples themselves about salmon and their own watersheds has been de-valued and ignored.

In recent years, there has been growing interest within the scientific community and among governments in the idea of free data sharing, or "open data". While this movement is made with the goal of increasing scientific integrity and learning, this development may lead to even greater pressure on First Nations to share their knowledge, which may not be aligned with their rights and interests.





Despite these challenges and trends, it has been increasingly recognized that Indigenous Peoples must retain the right to exercise ownership over Indigenous data and that this is vital to enable First Nations to achieve sovereignty and self-determinism (such as by following OCAP® Principles – discussed below). Current efforts by the BC government to advance reconciliation, including major initiatives such as collaborative stewardship and modernized land use planning, reflect a renewed commitment to co-development of planning and management approaches, and an acknowledgement of the importance of Indigenous data. Environmental policies such as the Fisheries Act are increasingly calling for the involvement of Indigenous Peoples and their expertise in decision-making.

Ownership and control of Indigenous data can enable Nations to exercise their decision-making authority gained through new co-development and co-management arrangements with the Province. For that reason, there is a need and opportunity for First Nations to articulate their policies towards Indigenous data, and identify practical tools and processes to govern what, how and why Indigenous data is collected, stored, controlled, accessed, and used.

There are many positive examples of new approaches for the collection, management, and use of Indigenous data in ways that benefit Indigenous Peoples. Most promising of all are the examples that move beyond an ‘extract with consent’ model and advance beyond well-intentioned but limited Equity, Diversity, and Inclusion (EDI) strategies. For example, frameworks have been developed to support Indigenous Peoples in governing their data. The FNIGC (First Nations Information and Governance Centre) established the principles of Ownership, Control, Access, and Possession (OCAP) of Indigenous data, which assert that First Nations should have control over how Indigenous data is collected, and define how that information can be used. The Global Indigenous Data Alliance’s CARE principles (Collective benefit, Authority to control, Responsibility and Ethics) also seek to help Indigenous Peoples around the world to govern their data in an “open data” world.

Further work can provide practical guidance for how First Nations could govern their data and how non-Indigenous people should behave in relation to Indigenous data. This is particularly challenging for those working in BC’s salmon watersheds, given the complexity of salmon life stages and habitat, the many diverse ecosystems and jurisdictions within BC, the cumulative effects of multiple activities, and the uncertainties related to a changing climate.

The WFI webinar will tackle these issues, asking the question: “How can First Nations effectively advance the governance, authority, and impact of Indigenous data related to salmon watersheds in BC?”

# SPEAKERS

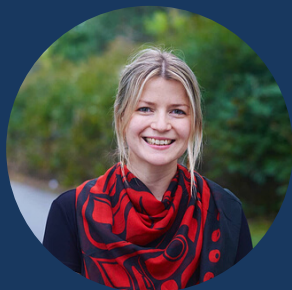

## ANDREA REID

### Assistant Professor & PI for the Centre for Indigenous Fisheries—University of British Columbia

Dr. Andrea Reid is a citizen of the Nisga'a Nation and an Assistant Professor with the University of British Columbia's Institute for the Oceans and Fisheries. She is helping to launch and lead the Centre for Indigenous Fisheries, working to build a national and international hub for the study and protection of culturally significant fish and fisheries. Her research program adopts highly interdisciplinary and applied approaches to improving our understanding of the complex interrelationships between fish, people and place. Reid's PhD in Biology (Governor General's Gold Medal; Carleton University '20) centered on multiple stressor effects on Pacific salmon, using tools and insights from Western and Indigenous sciences in tandem. Reid is a cofounder of Riparia, a Canadian charity that connects diverse young women with science on the water to grow the next generation of water protectors. She is also a National Geographic Explorer and a Fellow of The Explorers Club.

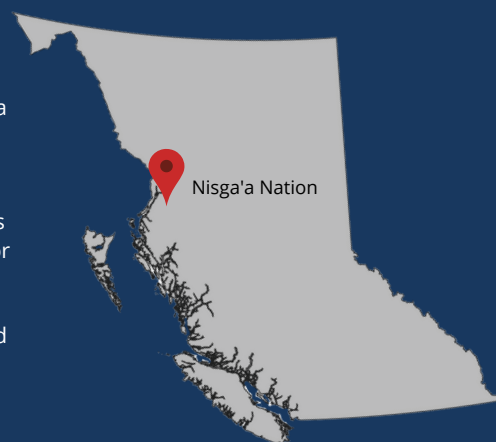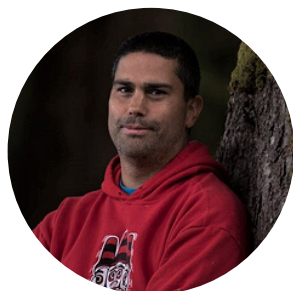

## SEAN YOUNG

### Manager/Curator of Collections and lab of Archaeology —Saahlinda Naay "Saving Things House" (Haida Gwaii Museum)

My name is Gid yakh'ii (Sean Young) I am a proud member of the Haida Nation. I'm part of the Gakyaals KiiGwaay Raven Clan of K'uuna Llnagaay (Skedans). I am currently the Manager/Curator of Collections and Lab of Archaeology at Saahlinda Naay "Saving Things House" (Haida Gwaii Museum) at Kay Llnagaay. I'm also an educated and trained field Archaeologist and have worked in this field since the summer of 1995. I am an instructor and guest lecturer for the Haida Gwaii Institutes Natural Resource Studies and Marine Conservation semester for the past four years. I've also worked for the Haida Gwaii Watchmen Program since 2004 as a cultural ambassador and caretaker living in ancient Haida villages and cultural sites every summer which are located within Gwaii Haanas Haida Heritage Site National Park Reserve.

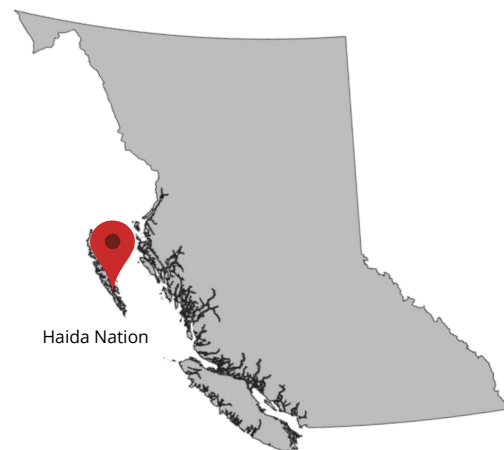

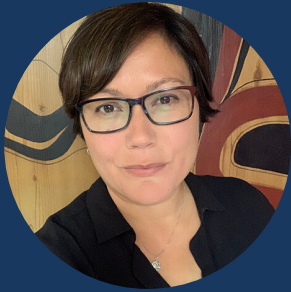

# TARA MARSDEN

## Wulp Sustainability Director—Gitanyow Hereditary Chiefs

Tara Marsden is a member of Gitanyow First Nation, and holds the traditional name Naxginkw. Tara has a Masters Degree in Political Science from the University of Northern BC. Over her 20-year career, she has worked for a number of First Nations, ENGOs, philanthropic organizations, post-secondary institutions, the provincial government, and the BC Forest Practices Board. Most recently, Tara spent 9 years as the Wulp Sustainability Director for the Gitanyow Hereditary Chiefs implementing the Gitanyow Lax'yip Land Use Plan and other sustainable development policies. While still playing a lead role with Gitanyow, Tara also works on contract with Healthy Watersheds Initiative as the Senior Indigenous Advisor, and runs her own consulting business Hlimoo Sustainable Solutions out of her home in Hazelton, BC.

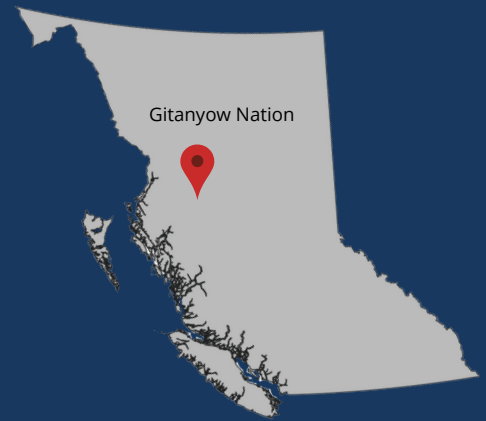

# JENNIFER WALKUS AND MEGAN ADAMS

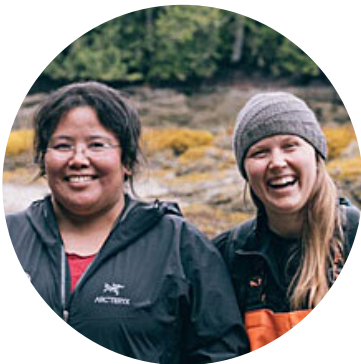

## Elected Councilor— Wuikinuxv Nation

Jennifer is a knowledge keeper and Council Member with the Wuikinuxv Nation. She is also the Former Stewardship & Fisheries Director - and much more. Jennifer has been involved with work from crabs, to bears, to salmon, related to how Wuikinuxv data is used to create scientific questions and inquiries that allow her Nation to impact and shape government policy.

## Postdoctoral Fellow, Conservation Decisions Lab—University of British Columbia

A settler with roots from the British Isles, Megan grew up in Treaty 7 territory in Alberta and is passionate about salmon and the ecosystems and communities they support. For over a decade, she has worked in close collaboration with First Nations on research projects aimed at upholding Indigenous sovereignty while also fulfilling stewardship objectives. Currently, Megan supports Central Coast Nations in various salmon programs as a coordinator with the Central Coast Indigenous Resource Alliance, and a postdoctoral researcher at the University of British Columbia. Prior to these projects, Megan collaborated with the Wuikinuxv Nation on a grizzly and black bear monitoring program.

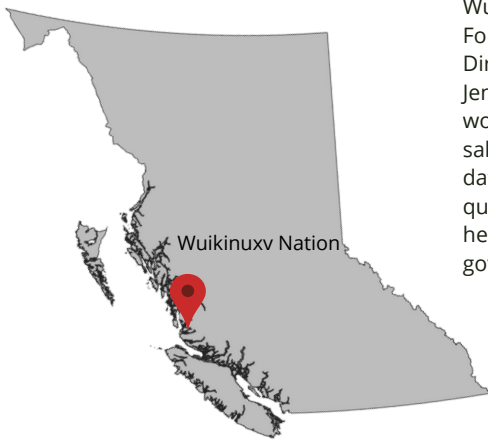

# KELLY SPECK

## Elected Councilor—'Namgis Nation

Kelly-Ann Speck has been involved in resource management work around British Columbia for over 30 years. Kelly has a Masters Degree in Public Administration from Queens University, and has held many positions, from Assistant Deputy Minister of Aboriginal Affairs, Skills & Training to the Regional Vice-Chair and Member of the Parole Board of Canada. She has been awarded the Lt Governor's Silver Medal for Excellence in Public Service and the Queen's Diamond Jubilee Medal for her work. Kelly has also served as Board Director for both the Vancouver Maritime Museum and the U'mista Museum & Cultural Center. Currently, she is an Elected Councilor of the 'Namgis First Nation, leading portfolios on health, forests, and land resources, and is the Chair fo the 'Namgis Health Board. Kelly is also a key voice in the 'Namgis' negotiations with BC, Canada, and industry.

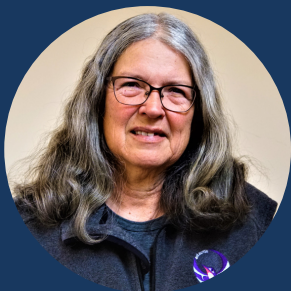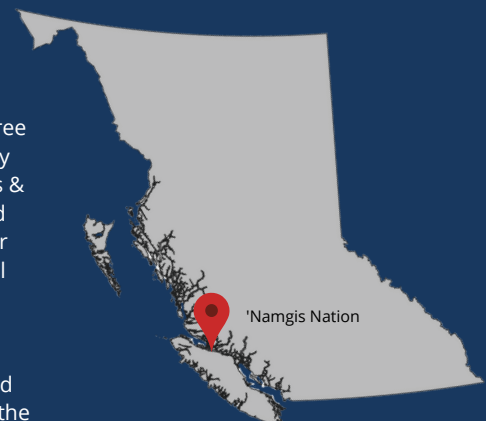

Supplement: facets-2023-0135suppla.pdf [file facets-2023-0135suppla.pdf]
