# Supplementary material for: Taking care of knowledge, taking care of salmon: towards Indigenous data sovereignty in an era of climate change and cumulative effects
Source: Atypon-hosted journal article supplement (doi:10.1139/facets-2023-0135), 2024-01-01
Supplement: facets-2023-0135suppld.pdf [file facets-2023-0135suppld.pdf]

## WFI JUNE 2 2022 WEBINAR – EVALUATION SUMMARY

1. Overall, how would you rate the webinar?

**Average: 4.43/5**

2. Please choose how strongly you agree with the following statements:

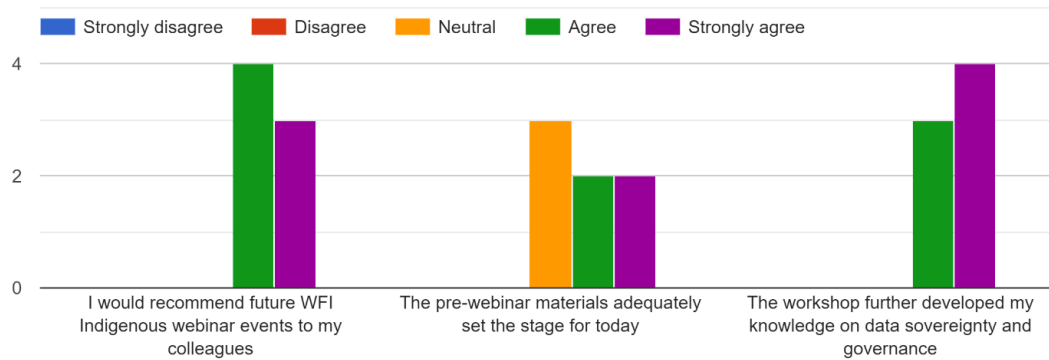

3. The goal of the webinar was to... To what extent did we achieve this goal in the webinar?

**Average: 4/5**

### Comments:

- Great to begin the discussion at this webinar but as always not enough time to dive in and potentially find some working synergies. I'll definitely be following up individually but wish there was a way to continue to connect in a bit more organized way. Any chance to create a community of practice on this topic?
- I see this webinar as the first step of many to work towards this goal.
- The connection to salmon, climate change, or CE was less tangible but I think that is ok. We needed to think about general data best practices.
- Makes me want more knowledge!
- Nice diversity of expression from Kelly, Barb and Tara
- There was lots of great discussions so it will be interesting to see how the team collates it into tangible recommendations, looking forward to it
- You achieved your goal.

4. What elements were the most useful? Why?

- The second webinar breakout allowed a chance to get into a deep discussion. Julian Griggs was an excellent facilitator!
- Many of the stories shared were very inspiring and demonstrated well thought out implementation.
- The second long breakout room was very useful.

- presentations and discussion. I learn so well that way :)
- videos/kelly schematic/Tara's responses in chat/Barb's final words.
- Hearing what is going on with other Nations and their tangible results was very inspiring and potentially implementable in the Nation I work for.
- The breakout sessions.

5. What elements of the webinar were the least useful? Why?

- Relatively speaking - the first breakout room was too short to get into a meaningful discussion beyond the round table intro and check in on what was striking about the presentations.
- N/a.
- The first breakout room felt more awkward than the second, we had less information to work with.
- My being late! :(
- Being in same groups with organization already generally know/about
- N/A.
- Nothing to answer here!

6. Was the workshop length appropriate?

7 responses

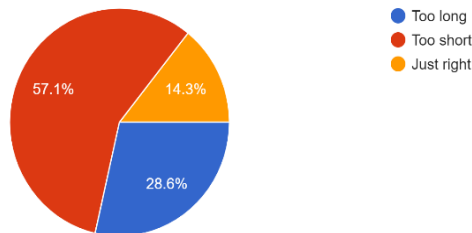

7. Were the number of presenters/speakers appropriate?

7 responses

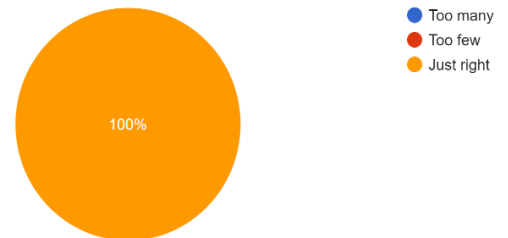

8. Was the length of breakout groups:

6 responses

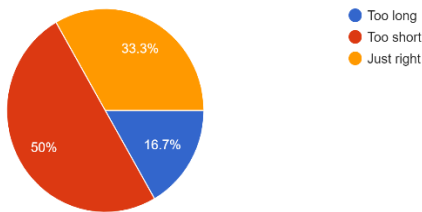

9. Was the size of breakout groups:

7 responses

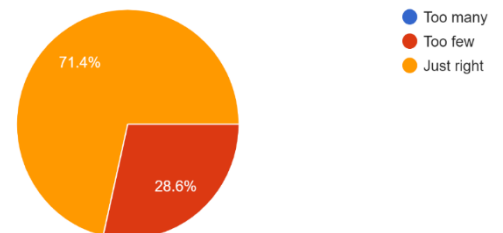

10. Was the structure of breakout groups:

7 responses

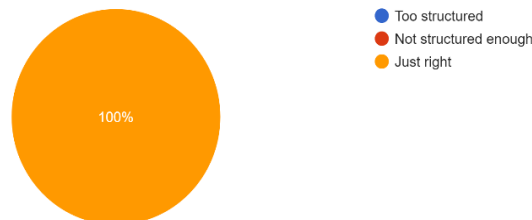

11. What topics would you like to discuss in future webinars?

- True Co-management - opportunities and implications; Inter nation relationships; long-term funding.
- A deeper look at UNDRIP/DRIIPA, how FOI policies (federal/provincial) affect data sharing, deep dive into data sharing agreements looking at what works and what to look out for, building capacity within organizations to further the conversation of Indigenous data sovereignty from within.
- Standards for philanthropy and funding - best practices for wage parity, continued access to funds, pushing back on funding models that work best for us and not for the Crown/big money.
- climate change and what we can do to make a difference for our descendants around Food Security and continuing to live along the known coasts.
- Indigenous Climate Action Initiatives/Pathways/Organizations/Speakers.
- Applicability of information for non-salmon bearing ecoregions like NEBC Artic watershed.

12. Any other general comments or feedback?

- Really grateful for the opportunity to be part of this. Appreciate interacting with specialists working on the ground and to be able to share common issues and solutions.
- Excellent webinar!
- Haawa to the Planning committee and all who sit and look at what needs to be discussed.
- Allow participants who identify as listeners/learners not to have to speak on zoom. This may allow for inclusive spaces for students and young people to feel comfortable staying online to learn and be inspired, etc.
